# Supplementary material for: Reactions of the methylsulfinyl radical [CH3(O)S˙] with oxygen (3O2) in solid argon
Source: Royal Society of Chemistry journal article supplement (doi:10.1039/c5cc02168e), 2015-01-01
Supplement: c5cc02168e1.pdf [file c5cc02168e1.pdf]

# Reactions of the methylsulfinyl radical [CH<sub>3</sub>(O)S<sup>•</sup>] with oxygen (<sup>3</sup>O<sub>2</sub>) in solid argon

Hans Peter Reisenauer,<sup>\*a</sup> Jaroslaw Romanski,<sup>b</sup> Grzegorz Mloston,<sup>\*b</sup> Peter R. Schreiner<sup>a</sup>

<sup>a</sup> Institute of Organic Chemistry, Justus-Liebig University, Heinrich-Buff-Ring 58, D-35392  
Giessen, Germany

<sup>b</sup> Department of Organic and Applied Chemistry, University of Lodz, Tamka 12, 91-403 Lodz,  
Poland

## Supplementary Information

### Table of Contents

|                                                                                                |    |
|------------------------------------------------------------------------------------------------|----|
| 1. Experimental methods                                                                        | S1 |
| 1. Computed Relative Energies of CH <sub>3</sub> SO <sub>3</sub> Isomers                       | S3 |
| 2. Rotamers of Methylsulfinyldioxy Radical ( <b>5</b> ) (CH <sub>3</sub> (O)SOO <sup>•</sup> ) | S3 |
| 3. Additional Spectroscopic Data                                                               | S4 |
| 4. Computational Results                                                                       | S8 |

### 1. Experimental Methods

Allylmethylsulfoxide (**2**) was prepared as described in reference.<sup>S1</sup> Experiments with isotopically labeled oxygen were performed with 97.1% <sup>18</sup>O<sub>2</sub> enriched oxygen from 'euriso-top' and used without further purification.

*Matrix Isolation Experiments.* The cryostat used for the matrix isolation studies was an APD Cryogenics HC-2 closed-cycle refrigerator system fitted with CsI windows for IR and BaF<sub>2</sub> windows for UV/Vis measurements. IR spectra were recorded with a Bruker IFS 55 FTIR spectrometer (4500–300 cm<sup>-1</sup>, resolution 0.7 cm<sup>-1</sup>), UV/Vis spectra with a JASCO V-670 spectrophotometer (spectral range: 190–2500 nm, resolution: ≥ 0.1 nm). We employed a small home built water-cooled oven directly connected to the vacuum shroud of the cryostat for the combination of high-vacuum flash pyrolysis (HVFP) with matrix isolation. The pyrolysis zone consisted of an empty quartz tube (inner diameter 8 mm, length of heating zone 50 mm) resistively heated by a coax heating wire; the temperature was controlled by a Ni/CrNi thermocouple. Allylmethylsulfoxide (**2**) was evaporated from a cooled storage bulb at –30 °C into the pyrolysis tube. Immediately after leaving the tube, at a distance of ca. 50 mm, the pyrolysis products were co-condensed with a large excess of an argon/oxygen gas-mixtures containing 0, 0.5, 1.0, or 5.0% O<sub>2</sub>, respectively, on the surface of the 10 K cold matrix window during a time of

2–4 h. In order to prevent reactions between the methylsulfinyl radical and O<sub>2</sub> in the gaseous phase, the argon/oxygen gas mixture was injected into the cryostat by a separate jet after the pyrolysis tube. Pyrolysis temperatures were varied between 500 and 900 °C; the optimal temperatures with respect to the yields of methylsulfinyl radicals (**1**) was 600 °C. For irradiations a mercury high-pressure lamp (Osram, HBO 200 in connection with a Bausch & Lomb monochromator (slits set to a spectral half-width of  $\Delta\lambda = 10$  nm) was used. The same procedure was applied for the CD<sub>3</sub> isotopologue. The reaction of allyl radicals with <sup>16</sup>O<sub>2</sub> and <sup>18</sup>O<sub>2</sub> was investigated in the same way by matrix isolating the HVFP products (900 °C) of 1,5-hexadiene (evaporated at –115 °C) in an argon matrix containing 5% O<sub>2</sub>.

**Computational methods.** We utilized DFT to assess reaction energies and equilibrium geometries, harmonic vibrational wavenumbers as well as IR intensities of all key structures using the B3LYP<sup>S2,S3</sup> functional with a large basis set including polarization and diffuse functions [6-311+G(3df,3pd)] as implemented in the GAUSSIAN 09 program.<sup>S4</sup> All stationary structures were characterized as minima or transition structures by computing analytical harmonic vibrational frequencies.

#### References:

- [S1] H. P. Reisenauer, J. Romański, G. Mlostoń, P. R. Schreiner, *Chem. Commun.* **2013**, *49*, 9467–9469.
- [S2] A. D. Becke, *Phys. Rev. A* **1988**, *38*, 3098–3100.
- [S3] B. Miehlich, A. Savin, H. Stoll, H. Preuss, *Chem. Phys. Lett.* **1989**, *157*, 200–206.
- [S4] M. J. Frisch, G. W. Trucks, H. B. Schlegel, G. E. Scuseria, M. A. Robb, J. R. Cheeseman, G. Scalmani, V. Barone, B. Mennucci, G. A. Petersson, H. Nakatsuji, M. Caricato, X. Li, H. P. Hratchian, A. F. Izmaylov, J. Bloino, G. Zheng, J. L. Sonnenberg, M. Hada, M. Ehara, K. Toyota, R. Fukuda, J. Hasegawa, M. Ishida, T. Nakajima, Y. Honda, O. Kitao, H. Nakai, T. Vreven, J. A. Montgomery Jr., J. E. Peralta, F. Ogliaro, M. Bearpark, J. J. Heyd, E. Brothers, K. N. Kudin, V. N. Staroverov, R. Kobayashi, J. Normand, K. Raghavachari, A. Rendell, J. C. Burant, S. S. Iyengar, J. Tomasi, M. Cossi, N. Rega, J. M. Millam, M. Klene, J. E. Knox, J. B. Cross, V. Bakken, C. Adamo, J. Jaramillo, R. Gomperts, R. E. Stratmann, O. Yazyev, A. J. Austin, R. Cammi, C. Pomelli, J. W. Ochterski, R. L. Martin, K. Morokuma, V. G. Zakrzewski, G. A. Voth, P. Salvador, J. J. Dannenberg, S. Dapprich, A. D. Daniels, Ö. Farkas, J. B. Foresman, J. V. Ortiz, J. Cioslowski, D. J. Fox, *Gaussian09 Revision D.01*, Gaussian Inc., Wallingford CT, 2013.

## 2. Computed Relative Energies of CH<sub>3</sub>SO<sub>3</sub> Isomers

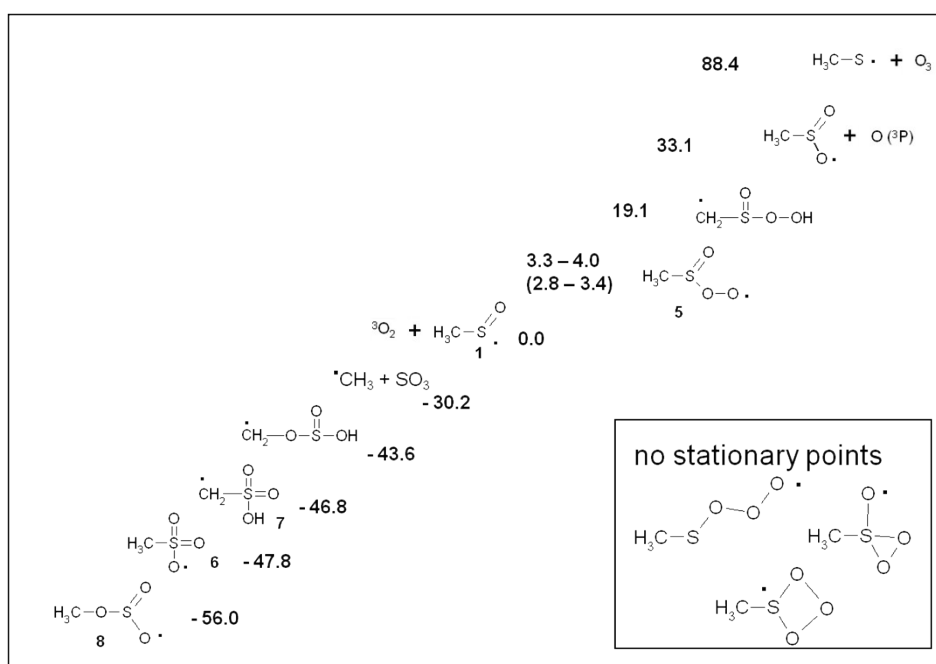

**Figure S1.** Computed relative energies ( $\Delta H_0 + \text{ZPVE}$ ) of conceivable reaction products of the methylsulfinyl radical ( $\text{CH}_3(\text{O})\text{S}^\bullet$ ) and molecular oxygen ( $^3\text{O}_2$ ) in kcal mol<sup>-1</sup> at the UB3LYP/6-311+G(3df,3pd) level of theory, (UMP2/6-311+G(3df,3pd) values in parenthesis).

## 3. Rotamers of Methylsulfinyldioxygen Radical (5) ( $\text{CH}_3(\text{O})\text{SOO}^\bullet$ )

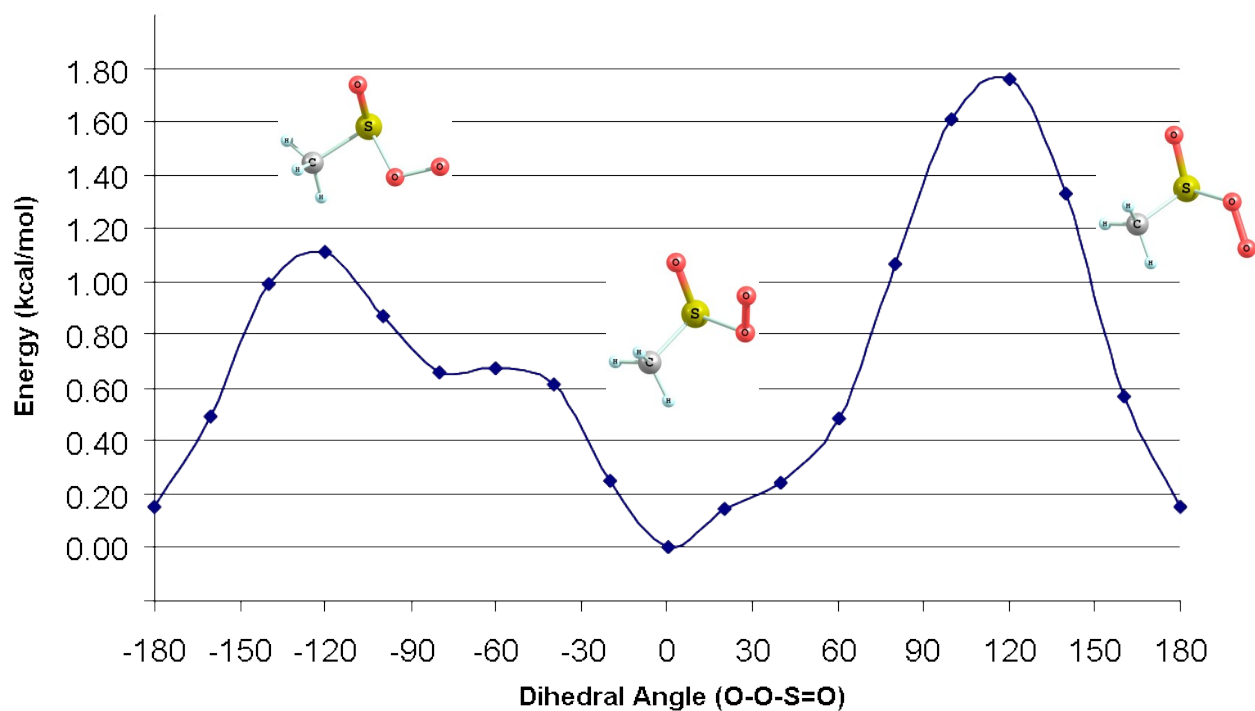

**Figure S2.** Computed energy profile of rotation around the (S-O) single bond of methylsulfinyldioxygen radical 5; relaxed scan at UB3LYP/6-311+G(3df,3pd).

## 4. Additional Spectroscopic Data

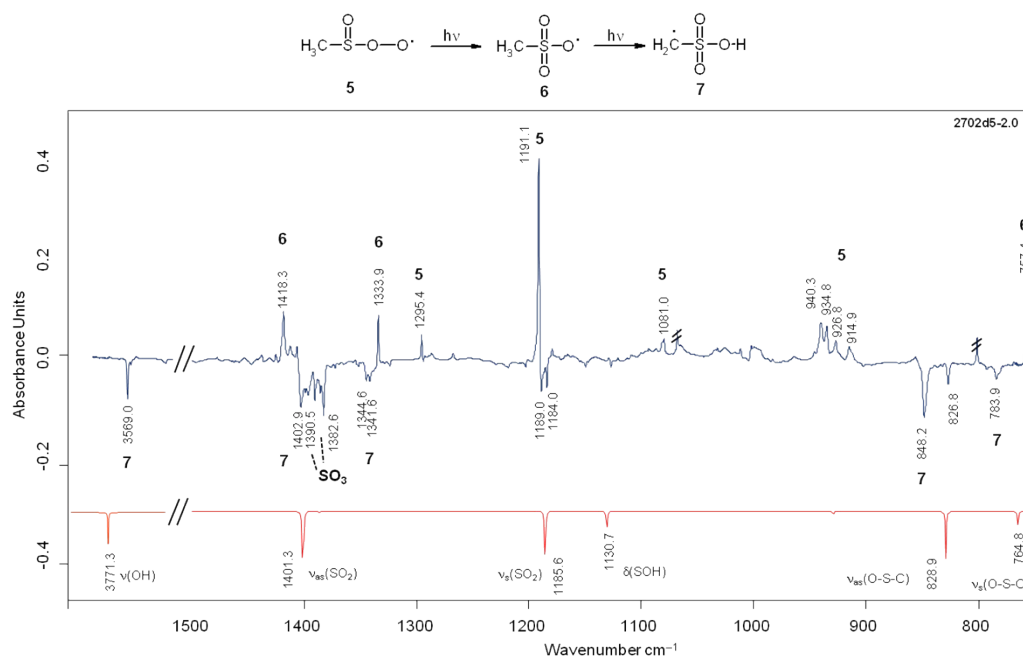

**Figure S3.** Photochemical isomerization of methylsulfonyloxyl radical ( $\text{CH}_3\text{-SO}_3^\bullet$ , **6**, positive bands vanish upon irradiation) to the C-centered radical of methylsulfonic acid (**7**, negative bands appear upon irradiation) with 435 nm light. Insert shows the OH-stretching spectral region. Red line: Computed IR spectrum of **7** at UB3LYP/6-311+G(3df,3pd).

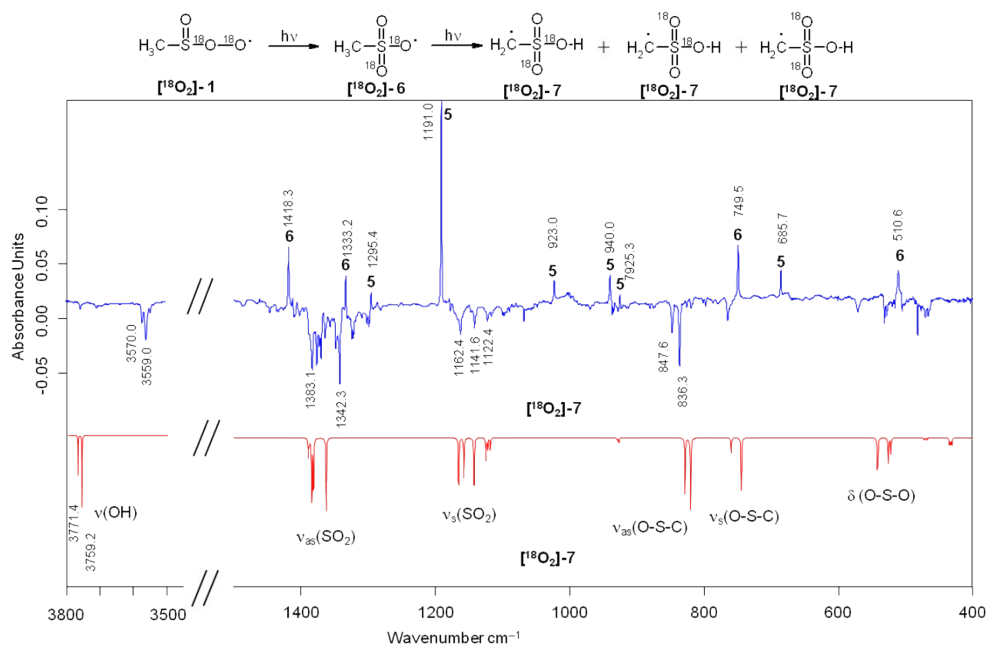

**Figure S4.** Photochemical isomerization of the  $[\text{}^{18}\text{O}_2]$ -methylsulfinylperoxy radical ( $[\text{}^{18}\text{O}_2]$ -1,  $\text{CH}_3(\text{O})\text{C}^{18}\text{O}^{18}\text{O}^\bullet$ ) and  $[\text{}^{18}\text{O}_2]$ -methylsulfonyloxyl radical ( $[\text{}^{18}\text{O}_2]$ -6,  $\text{CH}_3\text{-S}^{16}\text{O}^{18}\text{O}^{18}\text{O}^\bullet$ ) to C-radical of  $[\text{}^{18}\text{O}_2]$ -methylsulfonic acid ( $[\text{}^{18}\text{O}_2]$ -7,  $\text{CH}_2\text{-SO}_3\text{H}$ ) with 435 nm light; positive bands vanish upon irradiation, negative bands appear upon irradiation. Red line: Computed spectrum of an equimolar mixture of the three isotopologues of **7** (B3LYP/6-311+G(3df, 3pd)).

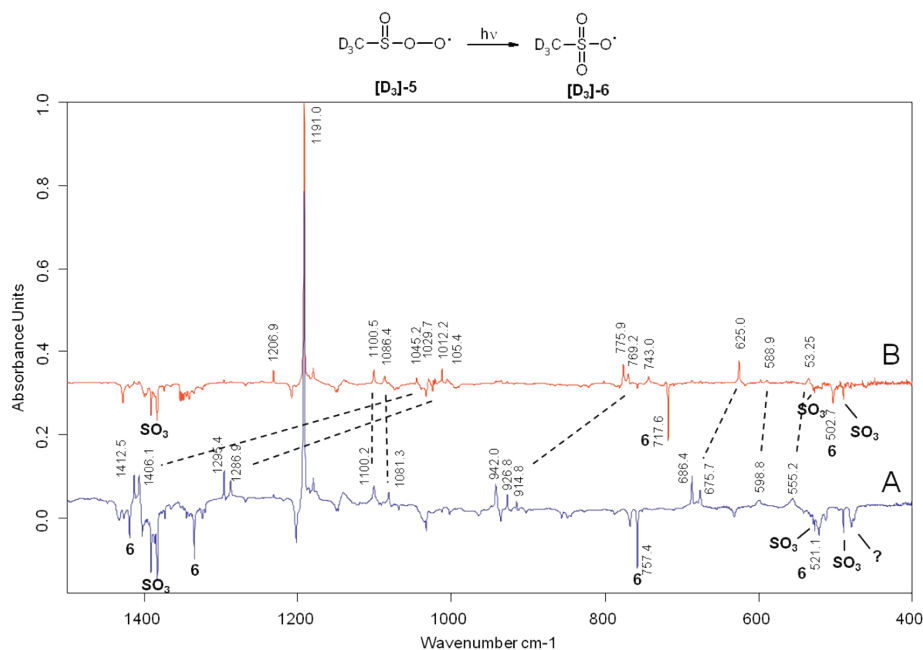

**Figure S5.** Experimental IR band shifts upon deuteration of the methylsulfinyl peroxy radical conformers (difference spectra after irradiation with 366 or 405 nm, Ar matrix, 10 K, positive bands vanish, negative bands appear upon irradiation); A: CH<sub>3</sub>-(O)SOO<sup>•</sup>; B: CD<sub>3</sub>-(O)SOO<sup>•</sup>

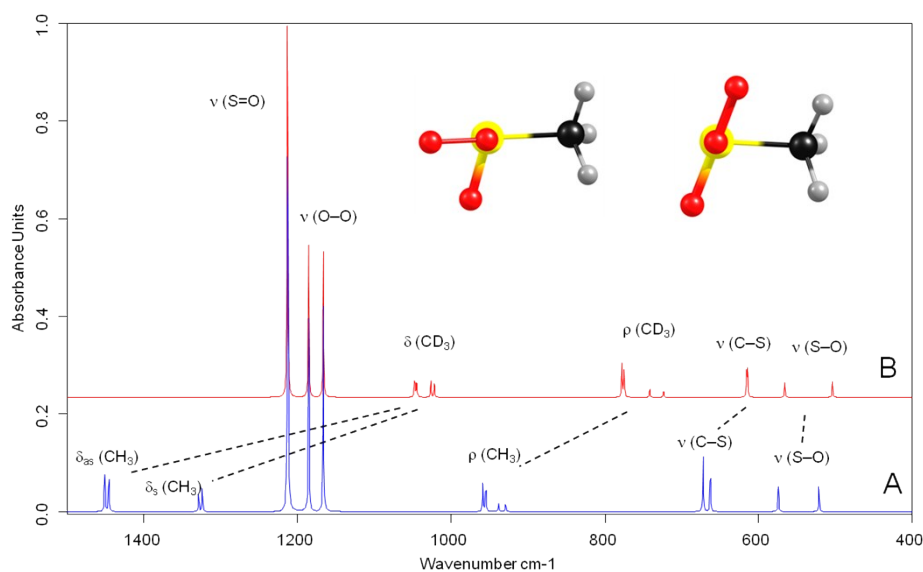

**Figure S6.** Computed IR band shifts upon deuteration of methylsulfinyl peroxy radical conformers (1:1 mixture, (UB3LYP/6-311+G(3df,3pd))); A: CH<sub>3</sub>-(O)SOO<sup>•</sup>; B: CD<sub>3</sub>-(O)SOO<sup>•</sup>

**Table S1.**  $^{18}\text{O}_2$  Band shifts of methylsulfinyldioxy radical **5**, valence force constants, and bond orders of the O–O and S–O bonds.

|        | $^{16}\text{O}_2$ | $^{18}\text{O}_2$ | $\Delta\nu$ , exp. | $\Delta\nu$ , theor. <sup>a</sup> | valence<br>force<br>constant <sup>b</sup> | bond<br>order <sup>c</sup> |
|--------|-------------------|-------------------|--------------------|-----------------------------------|-------------------------------------------|----------------------------|
| v(O–O) | 1100.3            | 1039.3            | –61.0              | –62.9                             | 5.7                                       | 0.83                       |
|        | 1081.3            | 1023.0            | –58.0              | –58.0                             | 5.5                                       | 0.81                       |
| v(S–O) | 598.8             | 575.2             | –23.6              | –23.6                             | 2.3                                       | 0.71                       |
|        | 555.3             | 534.0             | –21.3              | –21.0                             | 1.9                                       | 0.64                       |

<sup>a</sup>) 2-Atomic model (*Hooke's law*), <sup>b</sup>) force constants in  $\text{J m}^{-2}$ , <sup>c</sup>) see A. Fadini, S. Kemmer-Sack, *Z. Anorg. Allg. Chem.* **1977**, 435, 210–212.



## 5. Computational Results

**Table S3.** Computed four lowest excitation energies and oscillator strengths of CH<sub>3</sub>SO<sub>3</sub> isomers 5–8 (TD-UB3LYP/6-311+G(3df,3pd))

|          | Excitation Energy [eV] | Absorption Wavelength [nm] | Oszillator Strength |
|----------|------------------------|----------------------------|---------------------|
| <b>5</b> | 1.15                   | 1081                       | 0.0001              |
|          | 3.19                   | <b>388</b>                 | <b>0.005</b>        |
|          | 3.37                   | <b>368</b>                 | <b>0.003</b>        |
|          | 4.03                   | 308                        | 0.003               |
| <b>6</b> | 1.23                   | 1010                       | 0.001               |
|          | 1.51                   | 819                        | 0.000               |
|          | 2.60                   | <b>476</b>                 | <b>0.022</b>        |
|          | 4.85                   | 256                        | 0.011               |
| <b>7</b> | 3.94                   | 315                        | 0.004               |
|          | 4.06                   | 305                        | 0.003               |
|          | 4.39                   | 282                        | 0.009               |
|          | 5.02                   | 247                        | 0.011               |
| <b>8</b> | 2.87                   | 432                        | 0.0001              |
|          | 3.31                   | <b>375</b>                 | <b>0.011</b>        |
|          | 3.44                   | <b>361</b>                 | <b>0.007</b>        |
|          | 4.05                   | 306                        | 0.021               |

### Optimized geometries, energies, cartesian coordinates, and vibrational harmonic frequencies of optimized geometries on B3LYP/6-311+G(3df,3pd) level of theory

#### Methylsulfinyl Radical (1)

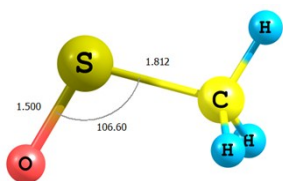

Symmetry: C<sub>s</sub>, State = <sup>2</sup>A'

E = -513.368757 Hartree, ZPVE = 25.12997 kcal/mol

Cartesian coordinates (x, y, z, in Å):

|   |              |              |              |
|---|--------------|--------------|--------------|
| C | -1.152081000 | -0.851382000 | 0.000000000  |
| S | 0.000000000  | 0.546917000  | 0.000000000  |
| H | -0.988513000 | -1.452896000 | 0.892382000  |
| H | -2.163234000 | -0.445226000 | 0.000000000  |
| H | -0.988513000 | -1.452896000 | -0.892382000 |
| O | 1.381594000  | -0.036420000 | 0.000000000  |

Vibrational Frequencies (cm<sup>-1</sup>, km mol<sup>-1</sup>):



|           |         |
|-----------|---------|
| 141.8153  | 0.4014  |
| 336.0001  | 6.8398  |
| 665.7302  | 13.3015 |
| 887.8612  | 1.0941  |
| 948.6347  | 10.2068 |
| 1072.7763 | 48.313  |
| 1326.414  | 1.5133  |
| 1445.4912 | 9.52    |
| 1459.0236 | 7.6648  |
| 3035.4739 | 2.9797  |
| 3129.5424 | 1.513   |
| 3129.909  | 3.3682  |

**Methylsulfinyloxyl radical, rotamer a (5a)**

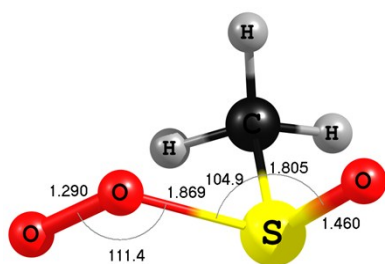

< OOSO: 176.6 °

Symmetry:  $C_1$ , State =  $^2A$

E = -663.7454169 Hartree, ZPVE = 29.32660 (Kcal/Mol)

Cartesian coordinates (x, y, z, in Å):

symmetry c1

|   |              |              |              |
|---|--------------|--------------|--------------|
| C | 0.500872000  | 1.520021000  | 0.203139000  |
| S | 0.525565000  | -0.168897000 | -0.432629000 |
| O | -2.083851000 | -0.006834000 | -0.142076000 |
| O | -1.081361000 | -0.586487000 | 0.425989000  |
| O | 1.548941000  | -0.896459000 | 0.311366000  |
| H | 0.563998000  | 1.476371000  | 1.288044000  |
| H | 1.369164000  | 2.026176000  | -0.215736000 |
| H | -0.417266000 | 1.997926000  | -0.131307000 |

Vibrational Frequencies ( $\text{cm}^{-1}$ ,  $\text{km mol}^{-1}$ ):

|           |          |
|-----------|----------|
| 93.4667   | 2.3443   |
| 192.2934  | 3.4757   |
| 202.4701  | 7.7349   |
| 262.1777  | 5.3343   |
| 293.575   | 1.1981   |
| 372.8215  | 12.6568  |
| 574.8375  | 11.9705  |
| 663.2582  | 20.0221  |
| 929.741   | 4.128    |
| 959.4776  | 12.848   |
| 1185.8587 | 92.2198  |
| 1212.8935 | 120.0462 |
| 1324.1689 | 10.7812  |
| 1445.8125 | 8.3944   |
| 1451.5989 | 10.7656  |
| 3046.5355 | 0.5451   |
| 3143.7892 | 0.1991   |
| 3159.476  | 0.1194   |

**Methylsulfinylperoxyl radical, rotamer b (5b)**

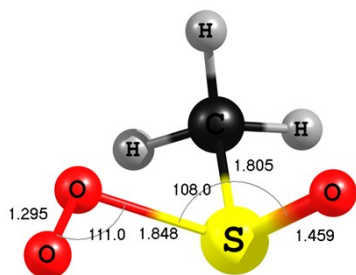

< OOSO: 72.6 °

Symmetry:  $C_1$ , State =  $^2A$

E = -663.7446155 Hartree, ZPVE = 29.245 (Kcal/Mol)

Cartesian coordinates (x, y, z, in Å):

```
symmetry c1
C      -1.480828000    -1.048424000    0.165797000
S      -0.408345000     0.272564000   -0.435587000
O       2.144953000    -0.040406000   -0.005188000
O       1.037183000    -0.668613000    0.227202000
O      -0.621131000     1.433358000    0.421578000
H      -1.345408000    -1.138882000    1.241190000
H      -2.501369000    -0.753353000   -0.068760000
H      -1.222772000    -1.972959000   -0.346560000
```

Vibrational Frequencies ( $\text{cm}^{-1}$ ,  $\text{km mol}^{-1}$ ):

|           |         |
|-----------|---------|
| 46.3529   | 1.0902  |
| 166.2314  | 0.1036  |
| 191.1556  | 1.5427  |
| 273.0331  | 3.0157  |
| 351.3724  | 18.7108 |
| 380.6603  | 9.5486  |
| 521.9987  | 11.0968 |
| 672.81    | 21.5658 |
| 938.6351  | 4.5172  |
| 955.428   | 12.4511 |
| 1166.8715 | 79.6131 |
| 1213.8063 | 99.5545 |
| 1328.9464 | 8.0695  |
| 1445.8515 | 8.8809  |
| 1451.1437 | 8.9492  |
| 3049.0355 | 0.4211  |
| 3148.9944 | 0.1921  |
| 3155.0656 | 0.1654  |

**Methylsulfinylperoxyl radical, rotamer c (5c)**

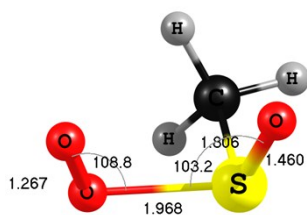

< OOSO: 0.4 °

Symmetry:  $C_1$ , State =  $^2A$

E = -663.7456571 Hartree, ZPVE = 29.162 (Kcal/Mol)

Cartesian coordinates (x, y, z, in Å):

```
symmetry c1
C      -1.354443000    -1.044740000    0.429812000
S      -0.560681000    0.289517000    -0.493752000
O       1.916548000    -0.056960000    0.414736000
O       1.157952000    -0.664141000    -0.398299000
O      -0.371670000    1.410000000    0.423424000
H      -0.870530000    -1.120779000    1.400833000
H      -2.406552000    -0.787274000    0.540514000
H      -1.248013000    -1.966971000    -0.139072000
```

Vibrational Frequencies (cm<sup>-1</sup>, km mol<sup>-1</sup>):

|           |          |
|-----------|----------|
| 69.7059   | 0.8479   |
| 170.4206  | 0.0893   |
| 200.3881  | 0.1145   |
| 240.9339  | 1.3223   |
| 274.2968  | 0.5901   |
| 360.7645  | 11.8411  |
| 530.9721  | 4.4624   |
| 665.0156  | 21.0456  |
| 920.133   | 2.4737   |
| 953.8744  | 10.4347  |
| 1189.6399 | 186.1776 |
| 1267.9904 | 63.7963  |
| 1326.7391 | 6.6111   |
| 1442.4268 | 9.6578   |
| 1452.4442 | 9.8338   |
| 3042.8643 | 0.7252   |
| 3138.4913 | 0.2203   |
| 3152.6947 | 0.1308   |

### Methylsulfonylperoxy radical, (6)

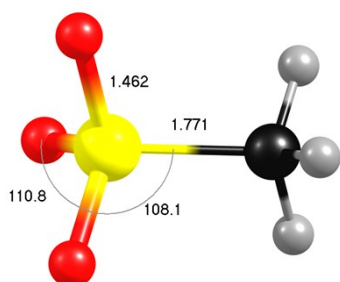

Symmetry: C<sub>3v</sub>, State = <sup>2</sup>A<sub>2</sub>

E = -663.8286783 Hartree, ZPVE = 30.212 (Kcal/Mol)

Cartesian coordinates (x, y, z, in Å):

```
symmetry c3v
C      0.000000000    0.000000000   -1.647918000
S      0.000000000    0.000000000    0.123573000
H      0.894284000    0.516315000   -1.985596000
H      0.000000000   -1.032630000   -1.985596000
H     -0.894284000    0.516315000   -1.985596000
O      0.000000000    1.390008000    0.577797000
O      1.203782000   -0.695004000    0.577797000
```

O -1.203782000 -0.695004000 0.577797000

Vibrational Frequencies (cm<sup>-1</sup>, km mol<sup>-1</sup>):

|           |          |
|-----------|----------|
| 138.711   | 5.3492   |
| 138.7764  | 5.3431   |
| 212.2213  | 0        |
| 327.3776  | 0.4563   |
| 327.3808  | 0.4569   |
| 523.3434  | 44.2182  |
| 753.6483  | 39.6087  |
| 969.4714  | 1.173    |
| 969.4735  | 1.1735   |
| 998.2933  | 3.0524   |
| 998.2946  | 3.0513   |
| 1082.1107 | 115.6575 |
| 1369.2291 | 13.8623  |
| 1460.2779 | 11.2791  |
| 1460.2796 | 11.2783  |
| 3068.8382 | 0.0409   |
| 3167.9655 | 0.3464   |
| 3167.9662 | 0.3464   |

#### Methylsulfonic acid C-radical, (7)

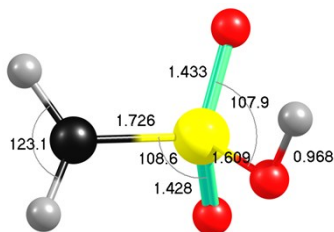

Symmetry: C<sub>1</sub>, State = <sup>2</sup>A

E = -663.8266458 Hartree, ZPVE = 29.841 (Kcal/Mol)

Cartesian coordinates (x, y, z, in Å):

symmetry c1

|   |              |              |              |
|---|--------------|--------------|--------------|
| S | 0.032664000  | 0.031628000  | -0.143591000 |
| C | -1.564278000 | -0.000566000 | 0.509268000  |
| O | 0.921954000  | -0.491709000 | 1.090682000  |
| O | 0.139964000  | -0.988974000 | -1.137009000 |
| O | 0.402590000  | 1.390712000  | -0.407300000 |
| H | -1.932198000 | -0.926304000 | 0.921922000  |
| H | -2.183672000 | 0.870641000  | 0.372712000  |
| H | 1.262851000  | 0.272785000  | 1.576227000  |

Vibrational Frequencies (cm<sup>-1</sup>, km mol<sup>-1</sup>):

|          |          |
|----------|----------|
| 62.6811  | 1.8362   |
| 278.1825 | 59.8586  |
| 296.7436 | 3.1459   |
| 345.6317 | 20.459   |
| 444.4069 | 22.7593  |
| 483.4508 | 5.5739   |
| 536.0369 | 53.7844  |
| 545.3805 | 53.8895  |
| 765.407  | 65.561   |
| 829.6665 | 169.2577 |
| 929.8967 | 9.8335   |

|           |          |
|-----------|----------|
| 1131.4295 | 57.4137  |
| 1186.3995 | 155.9836 |
| 1387.5823 | 5.7988   |
| 1401.7489 | 239.6104 |
| 3168.0388 | 1.4476   |
| 3310.4249 | 4.9468   |
| 3771.3517 | 122.039  |

**Methylsulfanyl radical, (8)**

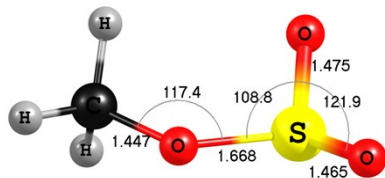

Symmetry:  $C_1$ , State =  $^2A$   
 E = -663.7734382 Hartree, ZPVE = 31.088 (Kcal/Mol)

Cartesian coordinates (x, y, z, in Å):

```

symmetry c1
C      2.069133000    -0.027793000    -0.017239000
O      0.826320000    -0.762332000    -0.112589000
S     -0.579734000     0.053423000     0.262910000
O     -0.454215000     1.450063000    -0.193035000
O     -1.657311000    -0.821114000    -0.207123000
H      2.276851000     0.250807000     1.018084000
H      2.823802000    -0.729651000    -0.367582000
H      2.041934000     0.857894000    -0.651656000
  
```

Vibrational Frequencies ( $\text{cm}^{-1}$ ,  $\text{km mol}^{-1}$ ):

|           |          |
|-----------|----------|
| 92.8641   | 2.6644   |
| 146.5687  | 1.6338   |
| 234.9718  | 2.6831   |
| 377.0915  | 7.3131   |
| 448.3898  | 3.1679   |
| 497.4465  | 33.4903  |
| 620.9881  | 138.5087 |
| 978.5241  | 140.2357 |
| 1038.7573 | 50.8764  |
| 1164.8783 | 1.3448   |
| 1173.1413 | 0.2292   |
| 1211.5421 | 145.8706 |
| 1460.3894 | 1.3017   |
| 1479.9042 | 13.0708  |
| 1495.8265 | 14.9245  |
| 3044.2671 | 24.2396  |
| 3127.0642 | 12.9511  |
| 3154.1043 | 2.372    |

**Methylsulfanic acid C-radical,**

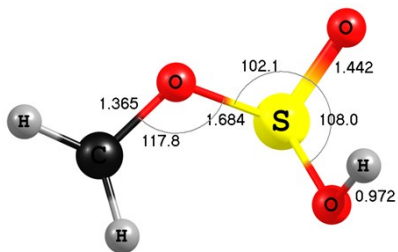

Symmetry:  $C_1$ , State =  $^2A$

E = -663.8201055 Hartree, ZPVE = 28.940 (Kcal/Mol)

Cartesian coordinates (x, y, z, in Å):

symmetry c1

|   |              |              |              |
|---|--------------|--------------|--------------|
| C | -2.092025000 | 0.001016000  | 0.063457000  |
| O | -0.927909000 | -0.598023000 | -0.323734000 |
| S | 0.498136000  | -0.099239000 | 0.419534000  |
| O | 1.492884000  | -0.868985000 | -0.285704000 |
| O | 0.543378000  | 1.425484000  | -0.151876000 |
| H | -2.091555000 | 1.057954000  | 0.282586000  |
| H | -2.978093000 | -0.554672000 | -0.191811000 |
| H | 0.784795000  | 1.410642000  | -1.093542000 |

Vibrational Frequencies ( $\text{cm}^{-1}$ ,  $\text{km mol}^{-1}$ ):

|           |          |
|-----------|----------|
| 105.6286  | 0.1298   |
| 185.9383  | 4.5819   |
| 241.0318  | 3.5999   |
| 284.5637  | 31.3869  |
| 403.6622  | 20.7167  |
| 410.9431  | 40.4741  |
| 444.5713  | 37.8641  |
| 487.5599  | 53.6129  |
| 631.393   | 230.1165 |
| 748.1329  | 194.752  |
| 1096.2028 | 45.0049  |
| 1156.2261 | 120.8021 |
| 1169.2856 | 50.5155  |
| 1269.1817 | 185.658  |
| 1467.6484 | 3.4352   |
| 3149.7319 | 10.9969  |
| 3297.915  | 0.6543   |
| 3694.6087 | 78.4721  |

**Methylsulfinic peroxyacid C-radical,**

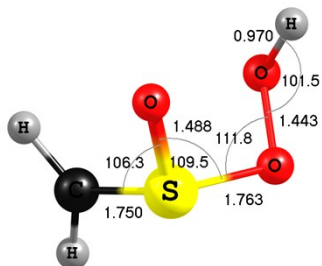

Symmetry:  $C_1$ , State =  $^2A$

E = -663.6666269 Hartree, ZPVE = 27.846 (Kcal/Mol)

Cartesian coordinates (x, y, z, in Å):

```
symmetry c1
C      -0.858405000    1.400688000    0.330751000
S      -0.655909000    -0.155779000    -0.442971000
O       1.084044000    -0.073895000    -0.713815000
O       1.807339000    0.146087000    0.515749000
H      -1.079534000    1.422804000    1.389851000
H      -0.787846000    2.291935000    -0.279615000
O      -0.948816000    -1.179962000    0.596158000
H       1.971824000    -0.764244000    0.808068000
```

Vibrational Frequencies (cm<sup>-1</sup>, km mol<sup>-1</sup>):

```
89.5913      12.9403
153.103      4.1741
206.1137     1.7946
272.9569     54.2823
340.4187     70.6078
359.29       24.3999
449.8416     5.3589
501.4713     32.5162
572.9958     67.3277
716.0835     15.5519
869.1638     20.2188
906.3959     6.5322
1120.2976    144.7761
1372.675     2.1767
1381.7264    46.0714
3137.9779    1.2011
3287.108     2.6453
3741.5178    63.9521
```

### Methylsulfonyl radical

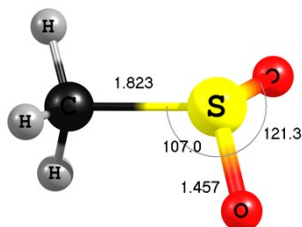

Symmetry: C<sub>s</sub>, State = <sup>2</sup>A'

E = -588.6059337Hartree, ZPVE = 28.307 (Kcal/Mol)

Cartesian coordinates (x, y, z, in Å):

```
symmetry cs
C       0.169385000    -1.572320000    0.000000000
S      -0.281365000     0.194072000    0.000000000
H       1.256896000    -1.608007000    0.000000000
H      -0.240770000    -2.016784000    -0.900975000
O       0.169385000     0.748147000    -1.270480000
```

Vibrational Frequencies (cm<sup>-1</sup>, km mol<sup>-1</sup>):

```
173.5106     0.0541
302.0618     0.0588
380.8776     21.2833
459.1564     15.6838
624.7657     16.1805
933.78       6.8457
```

|           |          |
|-----------|----------|
| 955.4796  | 0.0411   |
| 1076.4358 | 66.0962  |
| 1271.0911 | 141.4177 |
| 1312.29   | 0.9349   |
| 1446.7774 | 5.1483   |
| 1455.3276 | 9.6646   |
| 3060.62   | 0.2435   |
| 3164.1859 | 0.5048   |
| 3185.1076 | 0.0109   |

### Sulfur trioxide

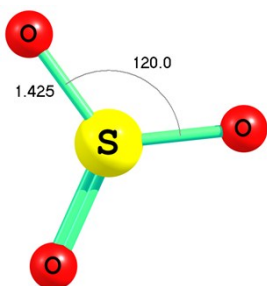

Symmetry:  $D_{3h}$ , State =  $^1A_1'$   
 E = -623.9363146 Hartree, ZPVE = 7.747 (Kcal/Mol)

Cartesian coordinates (x, y, z, in Å):

symmetry d3h

|   |              |              |              |
|---|--------------|--------------|--------------|
| S | 0.000000000  | 0.000000000  | 0.000000000  |
| O | 0.000000000  | 1.425298000  | 0.000000000  |
| O | 1.234345000  | -0.712649000 | 0.000000000  |
| O | -1.234345000 | -0.712649000 | 0.000000000  |
| O | 0.169385000  | 0.748147000  | -1.270480000 |

Vibrational Frequencies ( $\text{cm}^{-1}$ ,  $\text{km mol}^{-1}$ ):

|           |          |
|-----------|----------|
| 495.1432  | 33.3189  |
| 524.3584  | 25.7878  |
| 524.3688  | 25.7937  |
| 1076.2767 | 0        |
| 1399.5595 | 196.2911 |
| 1399.5625 | 196.3526 |
